# Supplementary material for: Aryl Hydrocarbon Receptor Activation Produces Heat Shock Protein 90 and 70 Overexpression, Prostaglandin E2/Wnt/β-Catenin Signaling Disruption, and Cell Proliferation in MCF-7 and MDA-MB-231 Cells after 24 h and 14 Days of Chlorpyrifos Treatment
Source: PubMed Central journal article supplement (PMC9132385; doi:10.1021/acs.chemrestox.1c00258), 2021-08-23
Supplement: tx1c00258_si_001.pdf [file tx1c00258_si_001.pdf]

## Supporting Information

### **Aryl hydrocarbon receptor activation produces heat shock protein 90 and 70 overexpression, prostaglandin E2/Wnt/ $\beta$ -catenin signaling disruption and cell proliferation in MCF-7 and MDA-MB-231 cells after 24 h and 14 days chlorpyrifos treatment.**

Paula Moyano<sup>\*1</sup>, José Manuel Garcia<sup>1</sup>, Jimena García<sup>3</sup>, Adela Pelayo<sup>2</sup>, Pilar Muñoz-

Calero<sup>2</sup>, María Teresa Frejo<sup>1</sup>, Andrea Flores<sup>1</sup>, and Javier del Pino<sup>\*1</sup>

<sup>1</sup>Department of Pharmacology and Toxicology, Veterinary School, Complutense University of Madrid, 28040-Madrid, Spain.

<sup>2</sup> Department of Legal Medicine, Psychiatry and Pathology, Medicine School, Complutense University of Madrid, 28040, Madrid, Spain

<sup>3</sup> Department of Pharmacology, Health Sciences School, Alfonso X University, 28691, Madrid, Spain.

**Supplementary Figure 1.**

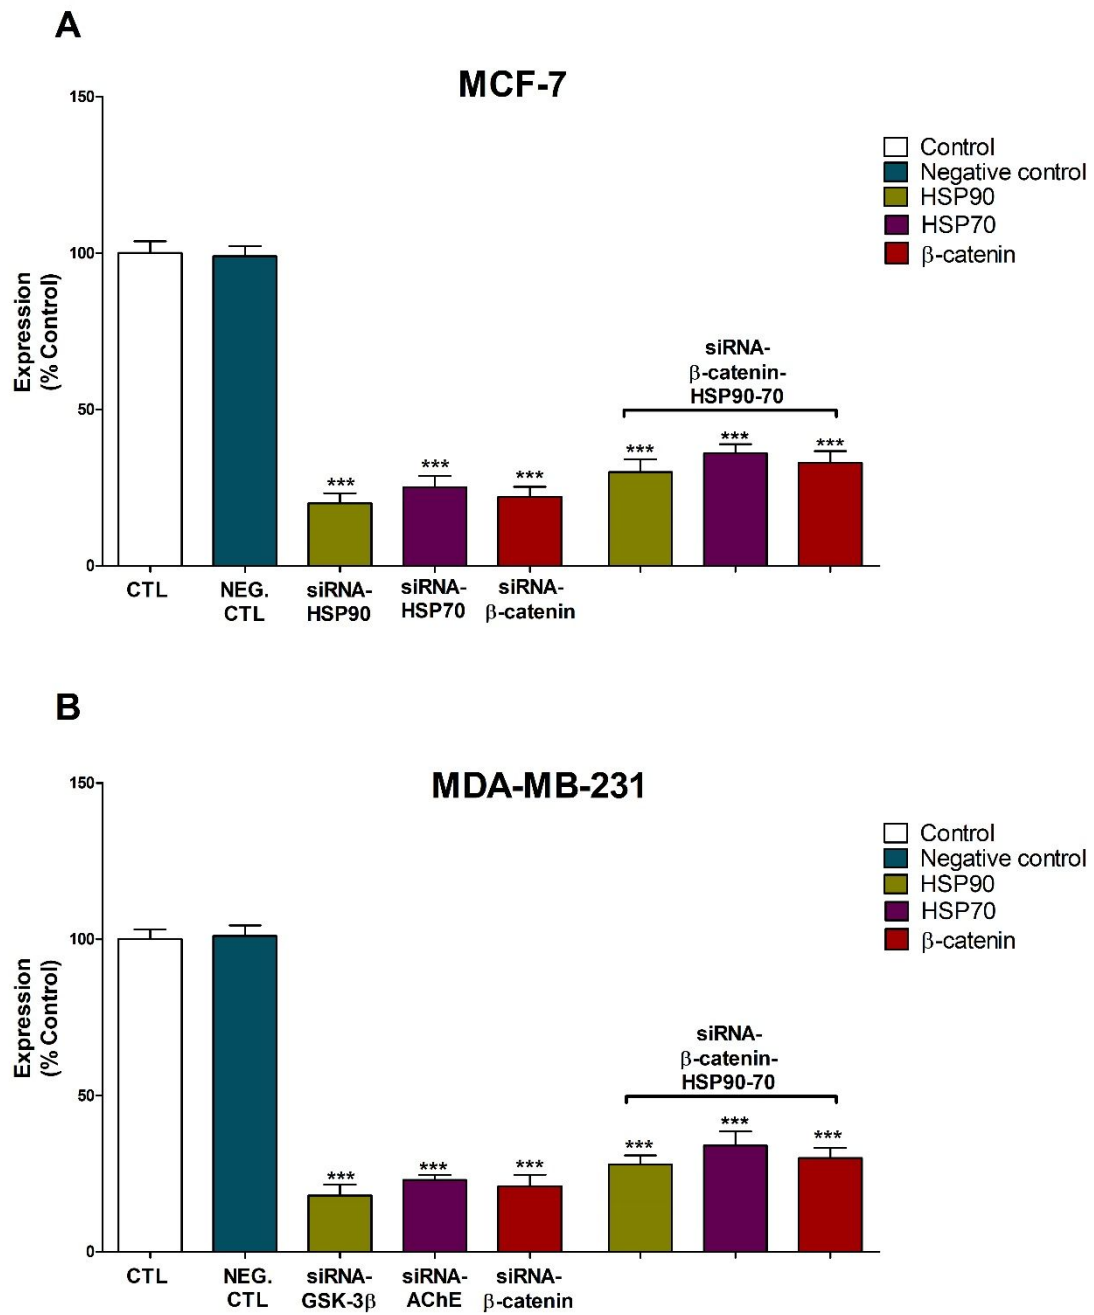

**Supplementary Figure 1.** Transfection efficiency for single or simultaneous siRNA targeting HSP90, HSP70, and β-catenin. \*\*\* $p \leq 0.001$  compared to the control.
